# Supplementary material
Source: publisher figshare collection journal article supplement (https://diabetesjournals.figshare.com/articles/dataset/_/17157959)

## **SUPPLEMENTARY DATA**

### **Cost-Related Medication Nonadherence in Adults with Diabetes in the United States: The National Health Interview Survey 2013 - 2018**

#### **Supplemental Tables:**

**Supplemental Table 1.** Components of CRN among Non-Elderly Adults with Diabetes, from the National Health Interview Survey, 2013-18.

**Supplemental Table 2.** Components of CRN among Elderly Adults with Diabetes, from the National Health Interview Survey, 2013-18.

#### **Supplemental Figures:**

**Figure S1.** Prevalence of CRN among elderly adults with diabetes who are Medicare beneficiaries with or without supplemental coverage, from the National Health Interview Survey, 2013-2018

Abbreviations: CRN, cost-related medication nonadherence

**Supplemental Table 1.**

Supplemental Table 1. Components of CRN among Non-Elderly Adults with Diabetes, from the National Health Interview Survey, 2013-18.

|                                                       | (1) Skipped medication doses to save money | (2) Took less medicine to save money | (3) Delayed filling a prescription to save money | (1), (2) and/or (3) = Cost-related medication nonadherence |
|-------------------------------------------------------|--------------------------------------------|--------------------------------------|--------------------------------------------------|------------------------------------------------------------|
| Sample (N)                                            | 1,297                                      | 1,347                                | 1,618                                            | 1,898                                                      |
| Weighted sample, (weighted %)                         | 1,628,269 (13.5)                           | 1,671,979 (13.9)                     | 1,977,493 (16.4)                                 | 2,338,902 (17.6)                                           |
| Sex, n (weighted %)                                   |                                            |                                      |                                                  |                                                            |
| Male                                                  | 11.8% (10.5, 13.0)                         | 11.6% (10.4, 12.8)                   | 14.1% (12.8, 15.3)                               | 14.9% (13.7, 16.2)                                         |
| Female                                                | 15.2% (13.9, 16.6)                         | 16.1% (14.7, 17.5)                   | 18.8% (17.3, 20.2)                               | 20.3% (18.9, 21.8)                                         |
| Race/Ethnicity, n (weighted %)                        |                                            |                                      |                                                  |                                                            |
| Non-Hispanic White                                    | 13.6% (12.4, 14.9)                         | 14.0% (12.8, 15.3)                   | 16.6% (15.3, 17.9)                               | 18.3% (17.0, 19.6)                                         |
| Non-Hispanic Black                                    | 15.4% (13.3, 17.4)                         | 16.2% (14.0, 18.3)                   | 18.8% (16.6, 20.9)                               | 19.9% (17.7, 22.2)                                         |
| Non-Hispanic Asian                                    | 6.2% (3.2, 9.2) *                          | 6.2% (3.3, 9.1) *                    | 4.7% (2.2, 7.1) *                                | 7.2% (4.2, 10.1) *                                         |
| Hispanic                                              | 13.9% (11.6, 16.2)                         | 13.8% (11.5, 16.1)                   | 17.3% (14.9, 19.6)                               | 17.1% (14.8, 19.3)                                         |
| Education, n (weighted %)                             |                                            |                                      |                                                  |                                                            |
| Some College or Higher                                | 12.7% (11.4, 13.9)                         | 12.9% (11.6, 14.1)                   | 15.1% (13.8, 16.4)                               | 16.5% (15.2, 17.8)                                         |
| HS/GED or Less than HS                                | 14.5% (13.2, 15.9)                         | 15.1% (13.8, 16.4)                   | 17.9% (16.4, 19.3)                               | 18.8% (17.4, 20.1)                                         |
| Insurance Status, n (weighted %)                      |                                            |                                      |                                                  |                                                            |
| Public                                                | 13.4% (11.9, 14.9)                         | 14.4% (12.9, 15.9)                   | 16.8% (15.2, 18.4)                               | 18.6% (17.0, 20.3)                                         |
| Private                                               | 9.9% (8.8, 11.0)                           | 9.9% (8.8, 11.0)                     | 12.5% (11.4, 13.6)                               | 13.8% (12.6, 14.9)                                         |
| Uninsured                                             | 34.3% (30.2, 38.4)                         | 34.5% (30.4, 38.5)                   | 37.2% (33.2, 41.2)                               | 32.2% (28.9, 35.6)                                         |
| Family Income, n (weighted %)                         |                                            |                                      |                                                  |                                                            |
| Middle/High-Income                                    | 10.0% (9.0, 11.1)                          | 9.8% (8.7, 10.9)                     | 12.3% (11.2, 13.4)                               | 13.5% (12.4, 14.6)                                         |
| Low-Income                                            | 19.0% (17.4, 20.7)                         | 20.0% (18.4, 21.7)                   | 23.1% (21.4, 24.8)                               | 23.9% (22.2, 25.5)                                         |
| Financial Hardship from Medical Bills, n (weighted %) |                                            |                                      |                                                  |                                                            |

|                                                |                    |                    |                    |                    |
|------------------------------------------------|--------------------|--------------------|--------------------|--------------------|
| No Financial Hardship from Medical Bills       | 5.8% (5.0, 6.6)    | 6.0% (5.2, 6.8)    | 6.7% (5.9, 7.6)    | 7.8% (7.0, 8.7)    |
| Financial Hardship from Medical Bills          | 24.1% (22.3, 26.0) | 24.7% (22.9, 26.5) | 29.7% (27.8, 31.6) | 31.5% (29.6, 33.4) |
| Region, n (weighted %)                         |                    |                    |                    |                    |
| Northeast                                      | 10.0% (8.0, 12.1)  | 10.2% (8.1, 12.4)  | 12.6% (10.3, 14.9) | 13.8% (11.5, 16.1) |
| Midwest                                        | 15.3% (13.4, 17.3) | 15.3% (13.4, 17.3) | 17.6% (15.8, 19.4) | 20.0% (18.1, 21.9) |
| South                                          | 15.0% (13.5, 16.4) | 15.7% (14.2, 17.2) | 18.7% (17.1, 20.3) | 19.4% (17.9, 21.0) |
| West                                           | 11.2% (9.1, 13.4)  | 11.4% (9.4, 13.4)  | 13.4% (11.5, 15.3) | 14.2% (12.3, 16.1) |
| Years since Diabetes diagnosis, n (weighted %) |                    |                    |                    |                    |
| < 10                                           | 12.7% (11.5, 14.0) | 12.9% (11.6, 14.1) | 14.8% (13.5, 16.0) | 16.2% (14.9, 17.4) |
| ≥ 10                                           | 14.5% (13.2, 15.9) | 15.2% (13.8, 16.6) | 18.5% (17.0, 20.0) | 19.6% (18.1, 21.0) |
| Now taking insulin, n (weighted %)             |                    |                    |                    |                    |
| No                                             | 12.9% (11.8, 14.0) | 13.3% (12.2, 14.4) | 15.6% (14.4, 16.8) | 16.6% (15.5, 17.8) |
| Yes                                            | 14.8% (13.1, 16.4) | 15.0% (13.5, 16.6) | 18.1% (16.4, 19.7) | 19.7% (18.0, 21.4) |
| Comorbidities, n (weighted %)                  |                    |                    |                    |                    |
| 0                                              | 9.3% (8.1, 10.4)   | 8.9% (7.8, 10.1)   | 11.0% (9.7, 12.3)  | 11.5% (10.2, 12.7) |
| 1                                              | 13.0% (11.4, 14.6) | 13.4% (11.8, 15.0) | 15.9% (14.3, 17.6) | 17.8% (16.2, 19.5) |
| ≥ 2                                            | 20.2% (18.1, 22.2) | 21.6% (19.5, 23.6) | 24.7% (22.6, 26.8) | 27.1% (24.9, 29.2) |
| ASCVD Status, n (weighted %)                   |                    |                    |                    |                    |
| No ASCVD                                       | 12.6% (11.6, 13.6) | 13.1% (12.1, 14.1) | 15.2% (14.2, 16.2) | 16.3% (15.4, 17.3) |
| ASCVD                                          | 17.4% (15.2, 19.6) | 17.3% (15.1, 19.5) | 21.6% (19.2, 24.0) | 23.3% (20.9, 25.7) |
| Smoking Status, n (weighted %)                 |                    |                    |                    |                    |
| Never smoker                                   | 11.0% (9.9, 12.1)  | 11.0% (9.9, 12.0)  | 14.0% (12.8, 15.2) | 14.8% (13.7, 16.0) |
| Former smoker                                  | 13.8% (11.9, 15.7) | 14.3% (12.4, 16.3) | 16.5% (14.5, 18.4) | 18.7% (16.6, 20.7) |
| Current smoker                                 | 20.2% (17.8, 22.7) | 21.5% (19.0, 23.9) | 23.2% (20.7, 25.6) | 24.1% (21.8, 26.5) |
| Obesity, n (weighted %)                        |                    |                    |                    |                    |
| No Obesity                                     | 11.5% (10.2, 12.9) | 12.2% (10.8, 13.5) | 14.0% (12.5, 15.5) | 15.6% (14.2, 17.0) |
| Obesity                                        | 14.7% (13.4, 15.9) | 14.9% (13.7, 16.1) | 17.8% (16.6, 19.1) | 18.8% (17.6, 20.1) |

|                                   |                    |                    |                    |                    |
|-----------------------------------|--------------------|--------------------|--------------------|--------------------|
| Physical Activity, n (weighted %) |                    |                    |                    |                    |
| Suff. Active                      | 12.1% (10.6, 13.6) | 11.8% (10.4, 13.3) | 13.9% (12.4, 15.4) | 15.8% (14.3, 17.4) |
| Insuff. Active                    | 14.4% (13.2, 15.6) | 15.0% (13.8, 16.2) | 17.9% (16.6, 19.1) | 18.7% (17.5, 19.9) |
| Hypertension, n (weighted %)      |                    |                    |                    |                    |
| No Hypertension                   | 11.3% (9.7, 12.8)  | 11.7% (10.2, 13.3) | 14.1% (12.5, 15.7) | 14.7% (13.2, 16.3) |
| Hypertension                      | 14.6% (13.4, 15.7) | 14.9% (13.8, 16.0) | 17.5% (16.3, 18.7) | 19.1% (17.9, 20.3) |
| High Cholesterol, n (weighted %)  |                    |                    |                    |                    |
| No High Cholesterol               | 10.5% (9.2, 11.8)  | 11.3% (10.0, 12.6) | 13.7% (12.3, 15.2) | 14.2% (12.8, 15.6) |
| High Cholesterol                  | 15.4% (14.1, 16.6) | 15.5% (14.2, 16.7) | 18.1% (16.9, 19.4) | 19.9% (18.6, 21.2) |

---

Abbreviations: CRN, cost-related medication nonadherence; HS, high school; GED, General Equivalency Diploma; ASCVD, atherosclerotic cardiovascular disease

\* These observations are included for descriptive purposes, but are insufficient to contribute to national estimates.

## Supplemental Table 2.

Supplemental Table 2. Components of CRN among Elderly Adults with Diabetes, from the National Health Interview Survey, 2013-18.

|                                  | (1) Skipped medication doses to save money | (2) Took less medicine to save money | (3) Delayed filling a prescription to save money | (1), (2) and/or (3) = Cost-related medication nonadherence |
|----------------------------------|--------------------------------------------|--------------------------------------|--------------------------------------------------|------------------------------------------------------------|
| Sample (N)                       | 423                                        | 477                                  | 560                                              | 715                                                        |
| Weighted sample, (weighted %)    | 387,871 (4.2)                              | 436,036 (4.7)                        | 536,047 (5.8)                                    | 673,568 (6.9)                                              |
| Sex, n (weighted %)              |                                            |                                      |                                                  |                                                            |
| Male                             | 3.6% (2.9, 4.3)                            | 3.9% (3.1, 4.6)                      | 4.6% (3.8, 5.4)                                  | 5.6% (4.7, 6.4)                                            |
| Female                           | 4.8% (4.0, 5.5)                            | 5.6% (4.7, 6.4)                      | 7.0% (6.0, 7.9)                                  | 8.2% (7.2, 9.2)                                            |
| Race/Ethnicity, n (weighted %)   |                                            |                                      |                                                  |                                                            |
| Non-Hispanic White               | 3.9% (3.3, 4.5)                            | 4.3% (3.7, 5.0)                      | 5.4% (4.7, 6.1)                                  | 6.4% (5.6, 7.2)                                            |
| Non-Hispanic Black               | 5.7% (4.2, 7.2)                            | 6.5% (4.8, 8.1)                      | 8.6% (6.6, 10.6)                                 | 9.4% (7.5, 11.3)                                           |
| Non-Hispanic Asian               | 4.0% (1.8, 6.1) *                          | 3.3% (1.7, 4.9) *                    | 3.8% (1.9, 5.7) *                                | 5.2% (2.8, 7.6) *                                          |
| Hispanic                         | 4.8% (3.3, 6.3)                            | 5.5% (3.6, 7.4)                      | 6.3% (4.5, 8.1)                                  | 7.5% (5.5, 9.5)                                            |
| Education, n (weighted %)        |                                            |                                      |                                                  |                                                            |
| Some College or Higher           | 4.3% (3.5, 5.0)                            | 4.8% (3.9, 5.6)                      | 6.1% (5.2, 7.0)                                  | 7.1% (6.2, 8.1)                                            |
| HS/GED or Less than HS           | 4.2% (3.5, 4.8)                            | 4.6% (3.9, 5.4)                      | 5.5% (4.7, 6.3)                                  | 6.6% (5.7, 7.5)                                            |
| Insurance Status, n (weighted %) |                                            |                                      |                                                  |                                                            |
| Public                           | 4.1% (3.6, 4.6)                            | 4.6% (4.1, 5.2)                      | 5.8% (5.1, 6.4)                                  | 6.8% (6.1, 7.4)                                            |
| Private                          | 4.1% (1.0, 7.2) *                          | 3.4% (0.6, 6.2) *                    | 4.8% (1.5, 8.0) *                                | 5.2% (1.8, 8.5) *                                          |
| Uninsured                        | 17.8% (5.5, 30.2) *                        | 21.2% (5.0, 37.4) *                  | 13.7% (2.6, 24.7) *                              | 28.9% (13.5, 44.4) *                                       |
| Family Income, n (weighted %)    |                                            |                                      |                                                  |                                                            |
| Middle/High-Income               | 2.8% (2.2, 3.4)                            | 3.3% (2.6, 3.9)                      | 4.2% (3.5, 4.9)                                  | 5.0% (4.2, 5.8)                                            |
| Low-Income                       | 6.7% (5.7, 7.7)                            | 7.4% (6.2, 8.5)                      | 8.9% (7.7, 10.1)                                 | 10.4% (9.1, 11.7)                                          |

|                                                       |                   |                    |                    |                    |
|-------------------------------------------------------|-------------------|--------------------|--------------------|--------------------|
| Financial Hardship from Medical Bills, n (weighted %) |                   |                    |                    |                    |
| No Financial Hardship from Medical Bills              | 2.2% (1.7, 2.6)   | 2.3% (1.9, 2.7)    | 2.8% (2.3, 3.3)    | 3.7% (3.1, 4.2)    |
| Financial Hardship from Medical Bills                 | 11.5% (9.8, 13.1) | 13.4% (11.5, 15.4) | 16.4% (14.2, 18.6) | 18.5% (16.3, 20.6) |
| Region, n (weighted %)                                |                   |                    |                    |                    |
| Northeast                                             | 3.2% (2.1, 4.2) * | 4.3% (3.1, 5.5)    | 5.0% (3.7, 6.3)    | 6.0% (4.6, 7.4)    |
| Midwest                                               | 4.2% (3.1, 5.3)   | 4.7% (3.4, 5.9)    | 6.0% (4.7, 7.4)    | 7.4% (5.8, 8.9)    |
| South                                                 | 4.8% (3.9, 5.7)   | 5.1% (4.2, 6.0)    | 6.2% (5.2, 7.1)    | 7.3% (6.3, 8.4)    |
| West                                                  | 3.9% (2.8, 4.9)   | 4.4% (3.1, 5.7)    | 5.6% (4.1, 7.0)    | 6.2% (4.8, 7.7)    |
| Years since Diabetes diagnosis, n (weighted %)        |                   |                    |                    |                    |
| < 10                                                  | 4.4% (3.4, 5.4)   | 5.1% (4.0, 6.3)    | 6.6% (5.3, 7.9)    | 7.6% (6.3, 8.9)    |
| ≥ 10                                                  | 4.1% (3.5, 4.7)   | 4.5% (3.9, 5.2)    | 5.5% (4.8, 6.2)    | 6.6% (5.8, 7.4)    |
| Now taking insulin, n (weighted %)                    |                   |                    |                    |                    |
| No                                                    | 3.5% (3.0, 4.1)   | 4.1% (3.5, 4.8)    | 5.0% (4.3, 5.7)    | 5.9% (5.2, 6.7)    |
| Yes                                                   | 5.8% (4.7, 6.9)   | 6.1% (5.0, 7.3)    | 7.7% (6.4, 9.0)    | 9.2% (7.8, 10.5)   |
| Comorbidities, n (weighted %)                         |                   |                    |                    |                    |
| 0                                                     | 2.4% (1.6, 3.2)   | 2.6% (1.8, 3.4)    | 3.2% (2.3, 4.1)    | 3.8% (2.9, 4.7)    |
| 1                                                     | 3.5% (2.7, 4.3)   | 4.1% (3.2, 5.1)    | 5.2% (4.2, 6.1)    | 6.4% (5.3, 7.5)    |
| ≥ 2                                                   | 5.9% (5.0, 6.8)   | 6.4% (5.5, 7.4)    | 7.9% (6.8, 9.0)    | 9.2% (8.0, 10.3)   |
| ASCVD Status, n (weighted %)                          |                   |                    |                    |                    |
| No ASCVD                                              | 3.6% (3.0, 4.2)   | 4.3% (3.6, 5.0)    | 5.3% (4.6, 6.1)    | 6.3% (5.5, 7.1)    |
| ASCVD                                                 | 5.2% (4.3, 6.1)   | 5.4% (4.5, 6.3)    | 6.6% (5.6, 7.7)    | 8.0% (6.9, 9.1)    |
| Smoking Status, n (weighted %)                        |                   |                    |                    |                    |
| Never smoker                                          | 3.9% (3.2, 4.6)   | 4.3% (3.5, 5.0)    | 5.5% (4.6, 6.4)    | 6.4% (5.5, 7.3)    |
| Former smoker                                         | 4.0% (3.3, 4.8)   | 4.6% (3.8, 5.5)    | 5.5% (4.6, 6.3)    | 6.8% (5.8, 7.8)    |
| Current smoker                                        | 6.9% (4.6, 9.2)   | 7.8% (5.1, 10.6)   | 9.3% (6.4, 12.3)   | 10.5% (7.6, 13.5)  |

|                                   |                 |                 |                 |                 |
|-----------------------------------|-----------------|-----------------|-----------------|-----------------|
| Obesity, n (weighted %)           |                 |                 |                 |                 |
| No Obesity                        | 3.4% (2.8, 4.0) | 3.6% (3.0, 4.2) | 4.4% (3.7, 5.1) | 5.4% (4.6, 6.1) |
| Obesity                           | 5.1% (4.3, 5.9) | 6.0% (5.0, 7.0) | 7.4% (6.4, 8.4) | 8.6% (7.5, 9.6) |
| Physical Activity, n (weighted %) |                 |                 |                 |                 |
| Suff. Active                      | 3.4% (2.5, 4.2) | 4.1% (3.1, 5.2) | 5.6% (4.4, 6.8) | 6.2% (5.0, 7.4) |
| Insuff. Active                    | 4.5% (3.9, 5.2) | 5.0% (4.3, 5.7) | 6.0% (5.2, 6.7) | 7.2% (6.4, 8.0) |
| Hypertension, n (weighted %)      |                 |                 |                 |                 |
| No Hypertension                   | 3.8% (2.7, 4.8) | 3.6% (2.5, 4.6) | 5.0% (3.7, 6.3) | 5.5% (4.3, 6.7) |
| Hypertension                      | 4.3% (3.7, 4.9) | 5.0% (4.3, 5.6) | 6.0% (5.3, 6.7) | 7.2% (6.4, 8.0) |
| High Cholesterol, n (weighted %)  |                 |                 |                 |                 |
| No High Cholesterol               | 3.6% (2.8, 4.4) | 3.8% (3.0, 4.6) | 4.6% (3.7, 5.5) | 5.5% (4.5, 6.5) |
| High Cholesterol                  | 4.5% (3.8, 5.2) | 5.2% (4.4, 5.9) | 6.4% (5.6, 7.2) | 7.6% (6.7, 8.4) |

---

Abbreviations: CRN, cost-related medication nonadherence; HS, high school; GED, General Equivalency Diploma; ASCVD, atherosclerotic cardiovascular disease

\* These observations are included for descriptive purposes, but are insufficient to contribute to national estimates.

**Figure S1.**

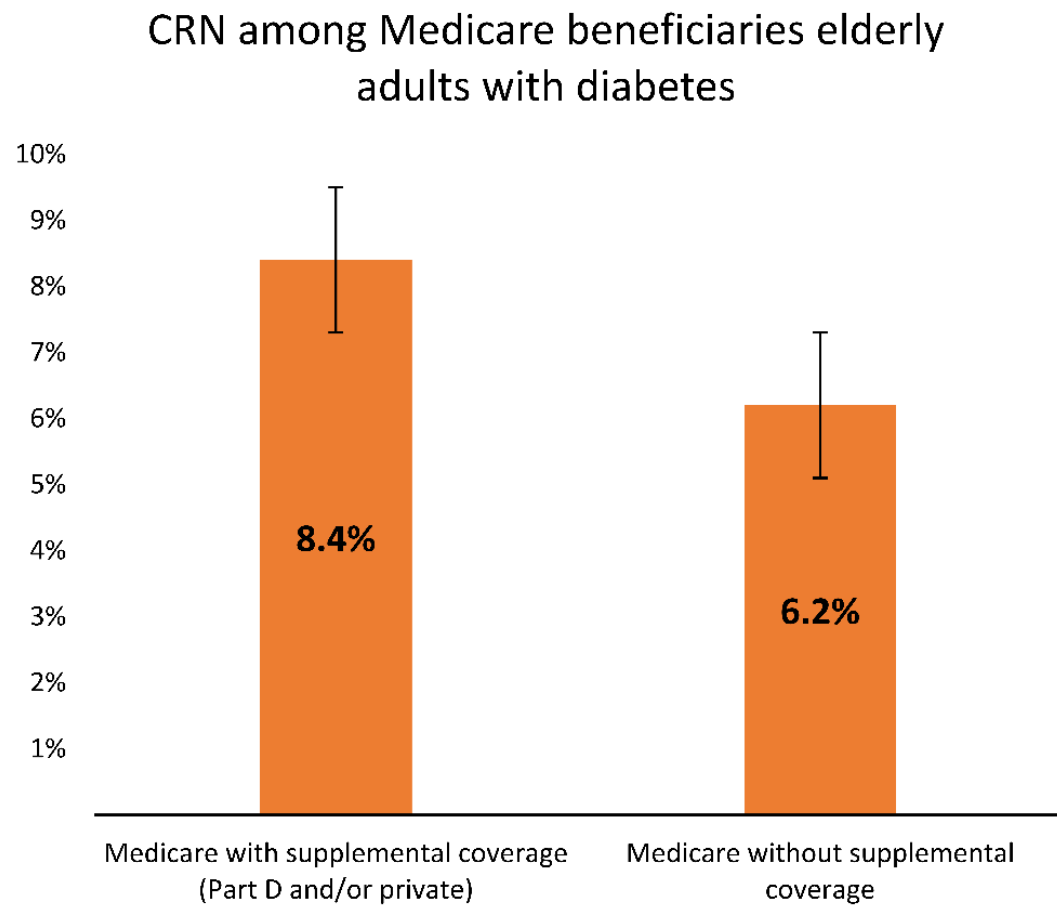

Supplement: Supplementary file 1 [file 1]
